# Supplementary material
Source: HighWire-hosted journal article supplement (https://erj.ersjournals.com/content/57/1/2002585)
Supplement: inline-supplementary-material-1 [file inline-supplementary-material-1.pdf]

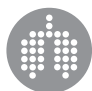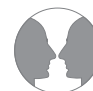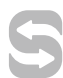

SHAREABLE PDF

# Effect of type and dosage of newly prescribed inhaled corticosteroids on obstructive lung disease and pneumonia hospitalisations in older individuals with asthma, COPD or both: a retrospective study of health administrative data

Tetyana Kendzerska <sup>1,2</sup>, Shawn D. Aaron <sup>1</sup>, Teresa To<sup>3,4,5</sup>, Chris Licskai<sup>6</sup>, Matthew B. Stanbrook<sup>4,7</sup>, Mary-Ellen Hogan<sup>8</sup>, Wan C. Tan<sup>9</sup>, Jean Bourbeau <sup>10</sup> and Andrea S. Gershon <sup>3,4,5,7,11</sup> for the Canadian Respiratory Research Network and CanBREATHE (the Canadian Best Respiratory Research Evaluation and Analyst Team of Health Experts)

**Affiliations:** <sup>1</sup>Dept of Medicine, University of Ottawa, Ottawa Hospital Research Institute, Ottawa, ON, Canada. <sup>2</sup>ICES, Ottawa, ON, Canada. <sup>3</sup>The Hospital for Sick Children, Research Institute, Toronto, ON, Canada. <sup>4</sup>ICES, Toronto, ON, Canada. <sup>5</sup>Dalla Lana School of Public Health, Toronto, ON, Canada. <sup>6</sup>Schulich School of Medicine & Dentistry, Western University, London, ON, Canada. <sup>7</sup>Dept of Medicine, University of Toronto, Toronto, ON, Canada. <sup>8</sup>Canadian Institute for Health Information, Toronto, ON, Canada. <sup>9</sup>University of British Columbia, Vancouver, BC, Canada. <sup>10</sup>McGill University, Research Institute of the McGill University Health Centre, Montreal, QC, Canada. <sup>11</sup>Sunnybrook Research Institute, Sunnybrook Health Sciences Centre, Toronto, ON, Canada.

**Correspondence:** Tetyana Kendzerska, The Ottawa Hospital, Civic Campus, Room #ASB-1-008, 1053 Carling Ave Ottawa, ON K1Y 4E9, Canada. E-mail tkendzerska@toh.ca

@ERSpublications

**This study suggested a less favourable safety-effectiveness profile for fluticasone compared to budesonide and other ICS in elderly individuals with asthma, COPD or both. Higher ICS dose was not associated with improved effectiveness in these populations.** <https://bit.ly/3iNdjkQ>

**Cite this article as:** Kendzerska T, Aaron SD, To T, *et al.* Effect of type and dosage of newly prescribed inhaled corticosteroids on obstructive lung disease and pneumonia hospitalisations in older individuals with asthma, COPD or both: a retrospective study of health administrative data. *Eur Respir J* 2021; 57: 2002585 [https://doi.org/10.1183/13993003.02585-2020].

This single-page version can be shared freely online.

## To the Editor:

The safety and risk-benefit profiles associated with different types and dosages of inhaled corticosteroids (ICS) in older individuals with asthma and COPD remain unknown [1, 2]. Limited evidence suggests that adults with asthma prescribed medium or high ICS doses are at risk of clinically important systemic side-effects that do not plateau with higher doses as efficacy outcomes do [3]. Older patients with COPD have been shown to have increased risk of pneumonia with both budesonide and fluticasone [4]; however, the risk seems greater with the latter [2, 4–6].
